# Supplementary material
Source: PubMed Central journal article supplement (PMC6581590)
Supplement: NIHMS1528674-supplement-1.pdf [file NIHMS1528674-supplement-1.pdf]

# Supplemental Figure 1

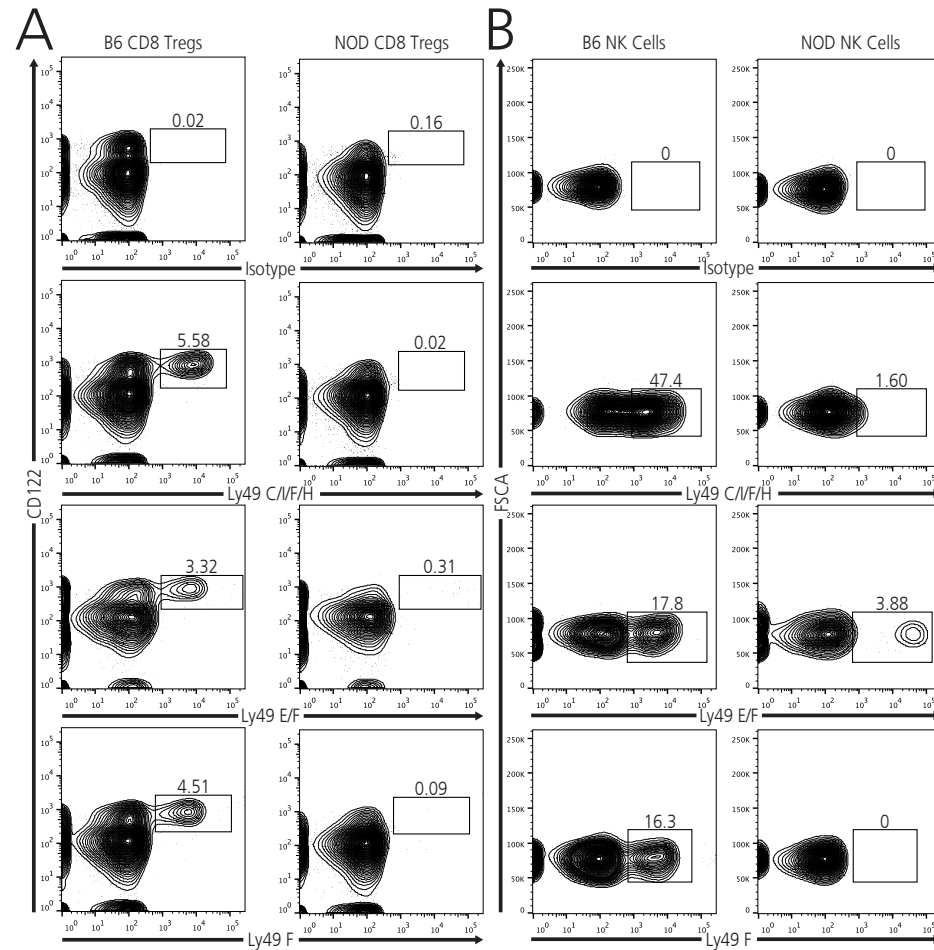

Supplemental Figure 1. *The Ly49E/F clone CM4 binds T<sub>FH</sub> targeting Ly49+ CD8Tregs in NOD mice.* Although NOD mice possess the largest Ly49 haplotype of any known mouse strain, many of the available anti-Ly49 antibody clones fail to detect Ly49 expression in the NOD mouse due to allelic differences. Accordingly, we tested multiple antibody clones that detect Ly49F to enumerate the most potent population of CD4T<sub>FH</sub> targeting CD8Tregs in NOD mice. Specifically, we determined that the anti-Ly49E/F clone CM4 binds a unique population of CD8 T cells and NK cells in NOD mice with high MFI, whereas the anti-Ly49C/I/F/H clone 14B11 and anti-Ly49F clone HBF-719 fail to detect these populations in this T1D prone strain.

## Supplemental Figure 2

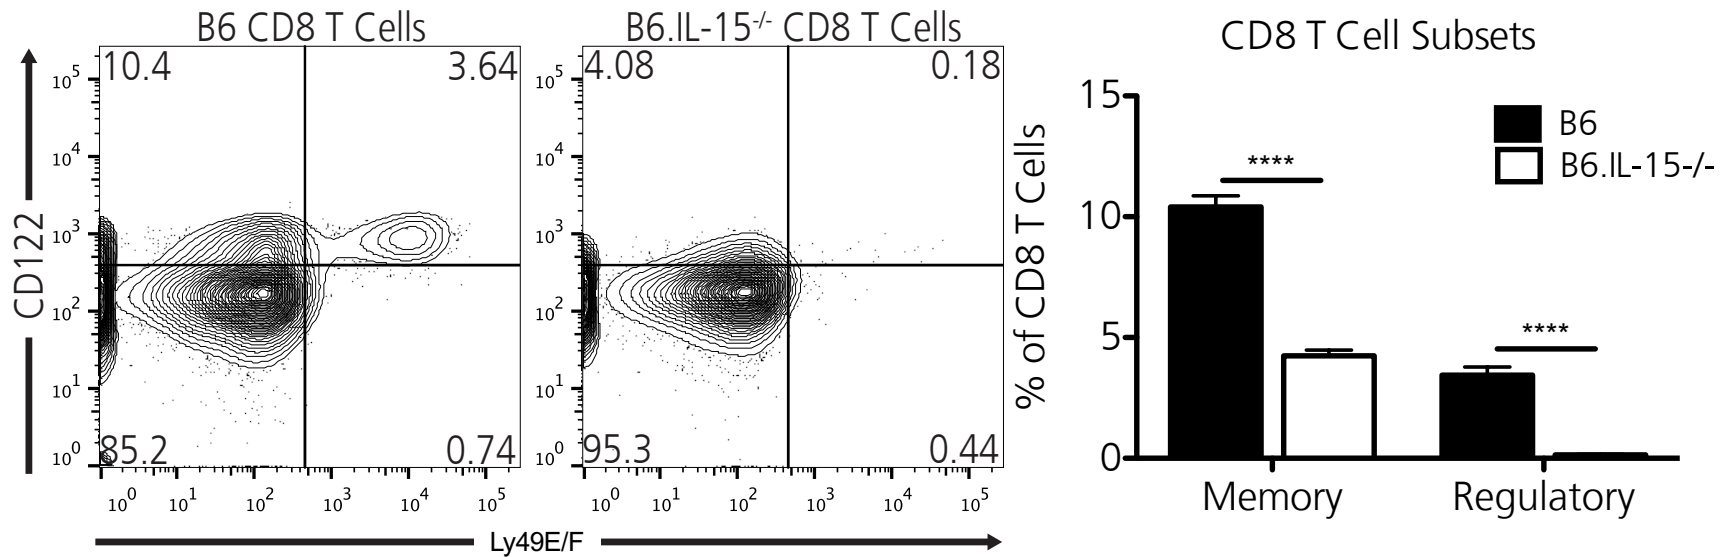

Supplemental Figure 2. *IL-15* deficient B6 mice lack CD122+Ly49+ CD8 Tregs and possess a condensed population of CD122+Ly49- memory CD8 T cells. B6 mice genetically deficient of IL-15 lack a splenic population of CD122+Ly49+ CD8 Tregs (upper right quadrant). Despite the absence of this cytokine however, these mice retain a reduced population of CD122+Ly49- memory CD8 T cells (upper left quadrant). N=5 mice per strain, \*\*\*\*p<0.0001 by two-way ANOVA followed by Bonferroni post-test.
